# Supplementary material for: Left Ventricular Blood Flow Kinetic Energy Assessment by 4D Flow Cardiovascular Magnetic Resonance: A Systematic Review of the Clinical Relevance
Source: PubMed Central journal article supplement (PMC7569817; doi:10.3390/jcdd7030037), 2020-09-10
Supplement: jcdd-07-00037-s001.pdf [file jcdd-07-00037-s001.pdf]

**Supplementary Figure S1.** Search details carried out on Medline and PubMed on 5th January 2019.

|                          |     |         |                                                        |                                    |
|--------------------------|-----|---------|--------------------------------------------------------|------------------------------------|
| <input type="checkbox"/> | 188 | Medline | (left ventricle kinetic energy).ti,ab                  | <a href="#">View Results (46)</a>  |
| <input type="checkbox"/> | 189 | Medline | (left ventricle energetics).ti,ab                      | <a href="#">View Results (76)</a>  |
| <input type="checkbox"/> | 190 | Medline | (intra ventricular energetics).ti,ab                   | <a href="#">View Results (8)</a>   |
| <input type="checkbox"/> | 191 | Medline | (four dimensional flow energetics).ti,ab               | <a href="#">View Results (5)</a>   |
| <input type="checkbox"/> | 192 | Medline | (4 D flow kinetic energy).ti,ab                        | <a href="#">View Results (32)</a>  |
| <input type="checkbox"/> | 193 | Medline | (4 D flow energetics).ti,ab                            | <a href="#">View Results (8)</a>   |
| <input type="checkbox"/> | 194 | Medline | (LV energetics).ti,ab                                  | <a href="#">View Results (129)</a> |
| <input type="checkbox"/> | 195 | Medline | (Cardiac Magnetic Resonance flow kinetics).ti,ab       | <a href="#">View Results (11)</a>  |
| <input type="checkbox"/> | 196 | Medline | (188 OR 189 OR 190 OR 191 OR 192 OR 193 OR 194 OR 195) | <a href="#">View Results (281)</a> |
| <input type="checkbox"/> | 197 | PubMed  | (left ventricle kinetic energy).ti,ab                  | <a href="#">View Results (71)</a>  |
| <input type="checkbox"/> | 198 | PubMed  | (left ventricle energetics).ti,ab                      | <a href="#">View Results (242)</a> |
| <input type="checkbox"/> | 199 | PubMed  | (intra ventricular energetics).ti,ab                   | <a href="#">View Results (3)</a>   |
| <input type="checkbox"/> | 200 | PubMed  | (four dimensional flow energetics).ti,ab               | <a href="#">View Results (2)</a>   |
| <input type="checkbox"/> | 201 | PubMed  | (4 D flow kinetic energy).ti,ab                        | <a href="#">View Results (1)</a>   |
| <input type="checkbox"/> | 202 | PubMed  | (4 D flow energetics).ti,ab                            | <a href="#">View Results (0)</a>   |
| <input type="checkbox"/> | 203 | PubMed  | (LV energetics).ti,ab                                  | <a href="#">View Results (14)</a>  |
| <input type="checkbox"/> | 204 | PubMed  | (Cardiac Magnetic Resonance flow kinetics).ti,ab       | <a href="#">View Results (4)</a>   |
| <input type="checkbox"/> | 205 | PubMed  | (197 OR 198 OR 199 OR 200 OR 201 OR 202 OR 203 OR 204) | <a href="#">View Results (322)</a> |

**Supplementary Table S1.** Unique database specific exclusion criteria for the final search of relevant papers.

| Medline                  | Pubmed                | EMBASE                                      | CINAHL                        |
|--------------------------|-----------------------|---------------------------------------------|-------------------------------|
| Echo                     | Animal study          | AR                                          | Cellular–<br>ribose/ubiquinol |
| RV                       | PET scan study        | Arterial Pulse<br>waveform                  | Echo                          |
| Arterial measurements    | Biologic engineering  | Invasive<br>catheterisation<br>measurements | Review                        |
| Cardiac assisted devices | Right ventricle study | Echo<br>measurements                        | Right ventricle               |

|                                    |                                        |                                                       |                                  |
|------------------------------------|----------------------------------------|-------------------------------------------------------|----------------------------------|
| Severe AS                          | Russian, Japanese                      | Animal sample-<br>mice, pigs, rabbits,<br>sheep, dogs | LA measurements                  |
| Biomedical engineering             | MRI results not<br>related to LV       | Biomedical<br>engineering                             | MRA                              |
| Dynamic whole body<br>study        | Invasive<br>measurements               | Right ventricle                                       | Animal -rabbit                   |
| Review article                     | Molecular and<br>cellular cardiology   |                                                       | Pediatrics                       |
| LVAD, prosthetic valves            | Surgical procedure-<br>ventriculectomy |                                                       | Pulmonary artery<br>measurements |
| Pediatrics                         | Children                               |                                                       |                                  |
| Non cardiac MR<br>modalities – PET | Atrial tissue, LVAD                    |                                                       |                                  |

|                          |     |        |                                                        |                                   |
|--------------------------|-----|--------|--------------------------------------------------------|-----------------------------------|
| <input type="checkbox"/> | 214 | CINAHL | (left ventricle kinetic energy).ti,ab                  | <a href="#">View Results (10)</a> |
| <input type="checkbox"/> | 215 | CINAHL | (left ventricle energetics).ti,ab                      | <a href="#">View Results (12)</a> |
| <input type="checkbox"/> | 216 | CINAHL | (intra ventricular energetics).ti,ab                   | <a href="#">View Results (4)</a>  |
| <input type="checkbox"/> | 217 | CINAHL | (four dimensional flow energetics).ti,ab               | <a href="#">View Results (4)</a>  |
| <input type="checkbox"/> | 218 | CINAHL | (4 D flow kinetic energy).ti,ab                        | <a href="#">View Results (0)</a>  |
| <input type="checkbox"/> | 219 | CINAHL | (4 D flow energetics).ti,ab                            | <a href="#">View Results (0)</a>  |
| <input type="checkbox"/> | 220 | CINAHL | (LV energetics).ti,ab                                  | <a href="#">View Results (21)</a> |
| <input type="checkbox"/> | 221 | CINAHL | (Cardiac Magnetic Resonance flow kinetics).ti,ab       | <a href="#">View Results (11)</a> |
| <input type="checkbox"/> | 222 | CINAHL | (214 OR 215 OR 216 OR 217 OR 218 OR 219 OR 220 OR 221) | <a href="#">View Results (49)</a> |
| <input type="checkbox"/> | 223 | EMBASE | (left ventricle kinetic energy).ti,ab                  | <a href="#">View Results (0)</a>  |
| <input type="checkbox"/> | 224 | EMBASE | (left ventricle energetics).ti,ab                      | <a href="#">View Results (2)</a>  |
| <input type="checkbox"/> | 225 | EMBASE | (intra ventricular energetics).ti,ab                   | <a href="#">View Results (0)</a>  |
| <input type="checkbox"/> | 226 | EMBASE | (four dimensional flow energetics).ti,ab               | <a href="#">View Results (0)</a>  |
| <input type="checkbox"/> | 227 | EMBASE | (4 D flow kinetic energy).ti,ab                        | <a href="#">View Results (0)</a>  |
| <input type="checkbox"/> | 228 | EMBASE | (4 D flow energetics).ti,ab                            | <a href="#">View Results (0)</a>  |
| <input type="checkbox"/> | 229 | EMBASE | (LV energetics).ti,ab                                  | <a href="#">View Results (23)</a> |
| <input type="checkbox"/> | 230 | EMBASE | (Cardiac Magnetic Resonance flow kinetics).ti,ab       | <a href="#">View Results (0)</a>  |
| <input type="checkbox"/> | 231 | EMBASE | (223 OR 224 OR 225 OR 226 OR 227 OR 228 OR 229 OR 230) | <a href="#">View Results (25)</a> |
